# Supplementary material for: Vitamin D3 attenuates Th2 responses to Aspergillus fumigatus mounted by CD4+ T cells from cystic fibrosis patients with allergic bronchopulmonary aspergillosis
Source: JCI journal article supplement (doi:10.1172/jci42388), 2010-08-16
Supplement: sd1 [file 1]

## Supplementary Figure 1

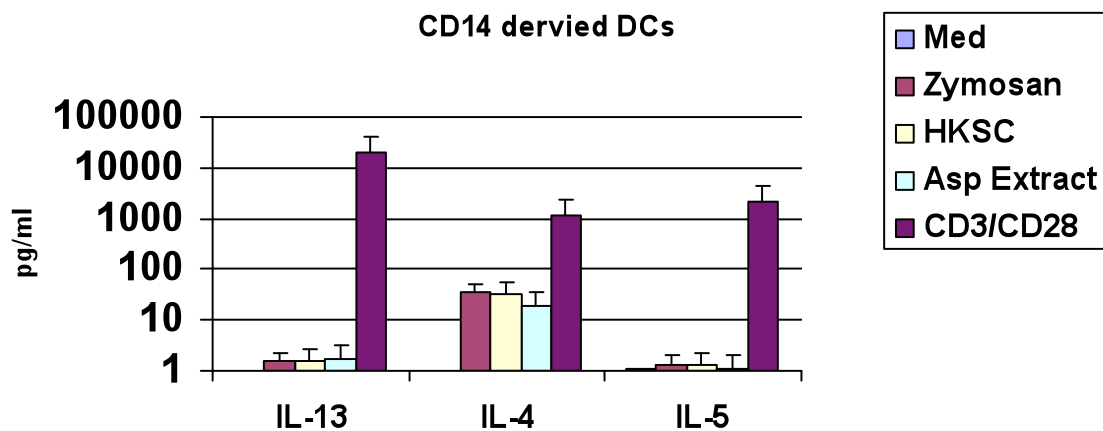

CD14<sup>+</sup> DCs elicit poor Th2 responses in patients with ABPA. CD14<sup>+</sup> DCs were grown in GM-CSF and IL-4 for 6 days from patients with confirmed ABPA (n=9) and pulsed with media, zymosan, HKSC, Asp Extract. CD4<sup>+</sup> T-cells were added to DCs or stimulated with CD3/CD28 beads for 96 hours. Supernatants were harvested and analyzed by Luminex for IL-4, IL-5, or IL-13 production.

## Supplementary Figure 2

A

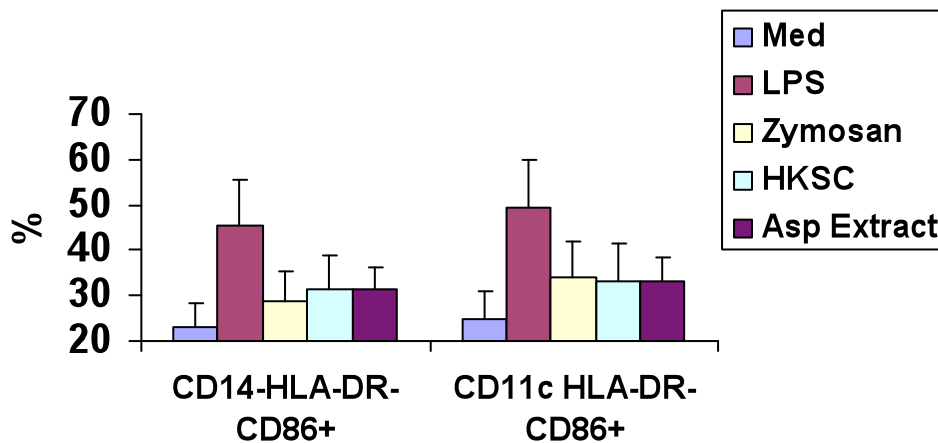

B

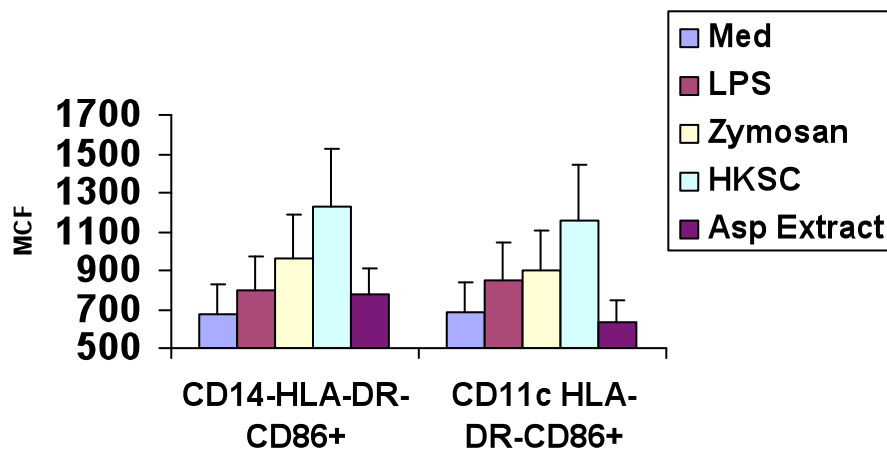

A. Relative percentages of HLA-DR<sup>+</sup> CD86<sup>+</sup> cells in CD14<sup>+</sup> or CD11c<sup>+</sup> DCs after stimulation with LPS, Zymosan or Asp Extract (n=9 each group). There were no statistical differences in the percentage of HLA-DR<sup>+</sup> CD86<sup>+</sup> cells between CD14<sup>+</sup> or CD11c<sup>+</sup> DCs.

B. Mean channel fluorescence of CD86 in CD14<sup>+</sup> versus CD11c<sup>+</sup> DCs after various treatments (n=9 per group).

## Supplementary Figure 3

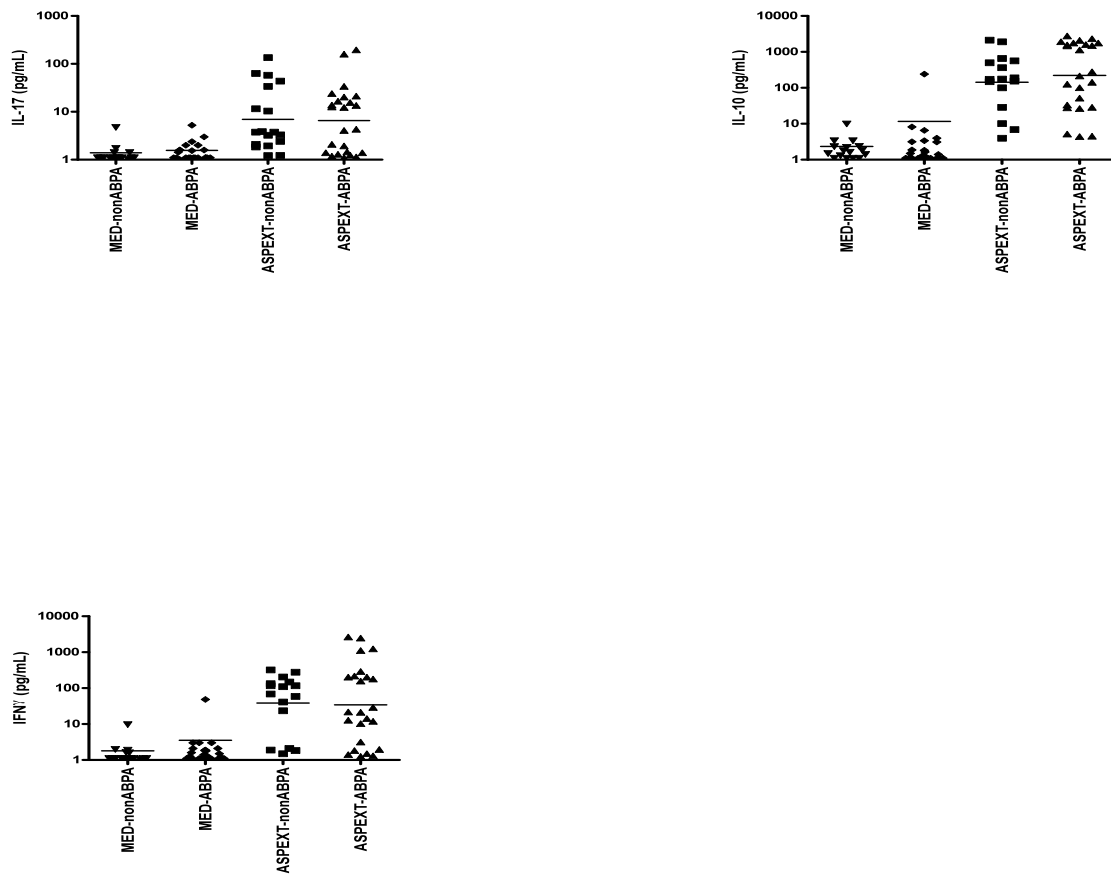

CD11c<sup>+</sup> DCs (n=16) from gender matched patients with documented Af colonization without ABPA (Non-APBA) or CD11c<sup>+</sup> DCs (n=24) from patients with confirmed ABPA were pulsed with media (not shown), Asp Extract. CD4<sup>+</sup> T-cells were added to DCs for 96 hours. Supernatants were harvested and analyzed by Luminex for IL-17, IL-10, or IFN $\gamma$  production.

## Supplementary Figure 4

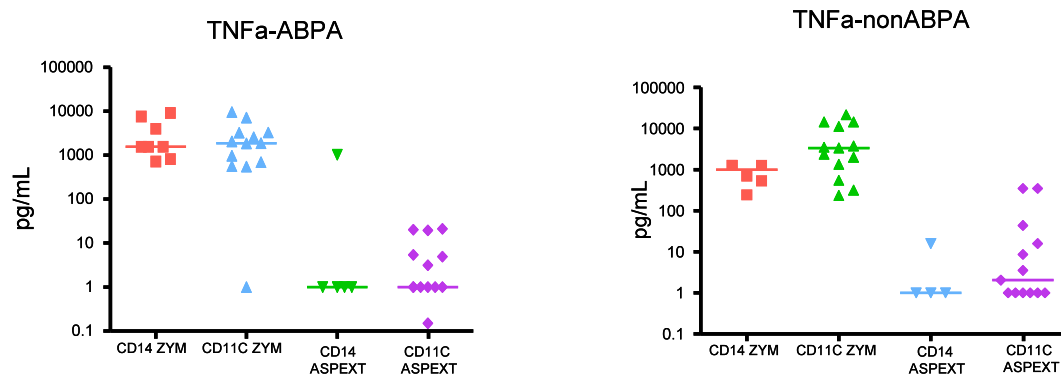

CD14+ DCs (n=6) grown in GM-CSF and IL-4 for 6 days, or CD11c+ DCs (n=19) from patients with confirmed ABPA pulsed with media (not shown), zymosan, or Asp Extract for 24 hours. Supernatants were harvested and analyzed by Luminex for TNF- $\alpha$ .

## Supplementary Figure 5

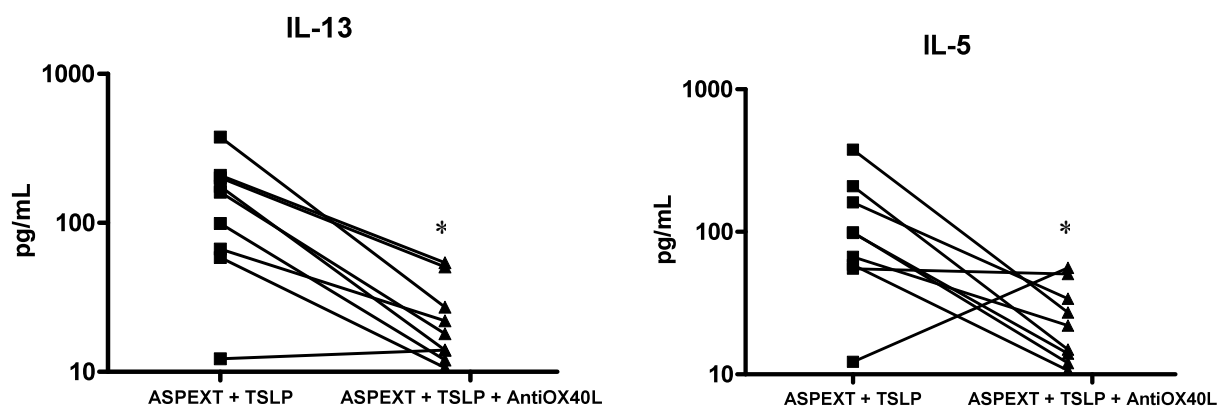

CD11c+ DCs with (n=7) from patients with non-ABPA were treated with TSLP (5 ng/ml) and then pulsed with Asp Extract with an isotype control antibody to anti-OX40L both from (B-D, PharMingen). Purified CD4+ T-cells were added for 96 hours. Supernatants were harvested and analyzed by Luminex for a) IL-13, and b) IL-5, production. \* denotes  $p < 0.05$  by Mann-Whitney.

## Supplementary Figure 6

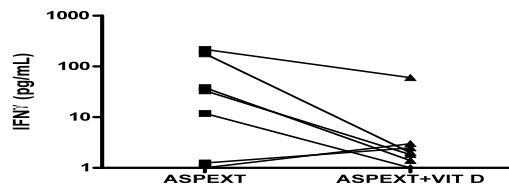

CD11c+ DCs from patients with ABPA (n=6) were pulsed with Aspergillus extract (ASPEXT) followed by addition of autologous bulk CD4+ T-cells followed by addition of 1, 25 OH-vitamin D3 or vehicle. Cells were incubated for 96 hours and IFN $\gamma$  was measured in cell supernatants by Luminex. Differences in IFN $\gamma$  production were non-significant.

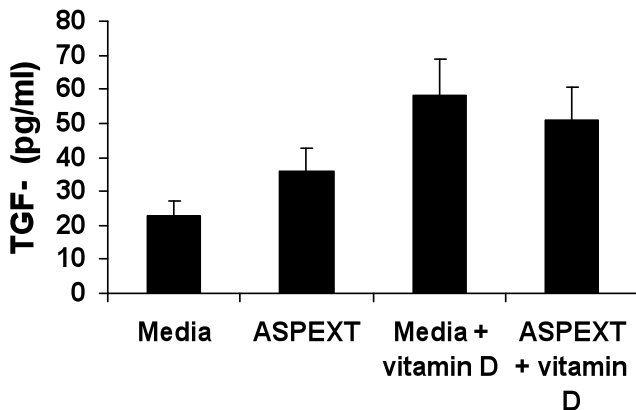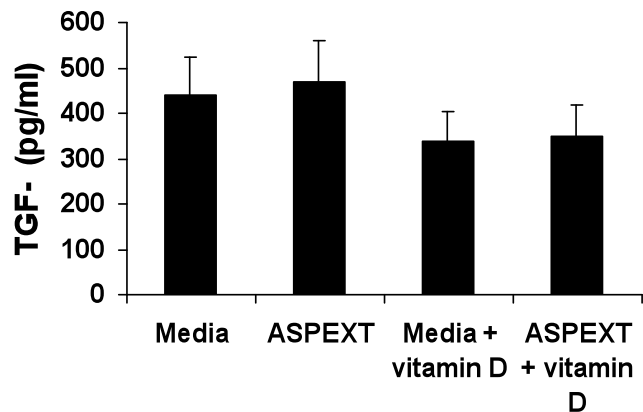

CD11c+ DCs from patients with ABPA (n=6) were pulsed with media or Aspergillus extract (ASPEXT) followed by addition of autologous bulk CD4+ T-cells followed by addition of 1, 25 OH-vitamin D3 or vehicle. Cells were incubated for 96 hours and active (left panel) and total (right panel) TGF $\beta$  was measured in cell supernatants by ELISA (R & D systems). Differences in TGF $\beta$  production were non-significant.

Supplementary Table I

|                    | ABPA Positive                                                                                                                    | ABPA Negative                                                                                              | P-Value |
|--------------------|----------------------------------------------------------------------------------------------------------------------------------|------------------------------------------------------------------------------------------------------------|---------|
| FEV1 (L)           | 2.739±0.3486 (0.96-6.81)                                                                                                         | 2.120±0.3065 (0.72-4.89)                                                                                   | 0.1875  |
| FEV1 (% Predicted) | 67.32±5.925 (31-117)                                                                                                             | 62.6±5.689 (26-98)                                                                                         | 0.8487  |
| BMI                | 22.57±0.6364 (17.22-27.68)                                                                                                       | 21.96±1.222 (17.19-32.24)                                                                                  | 0.2707  |
| IgE (IU/mL)        | 465.6 ± <b>134.3</b> (2-2000)                                                                                                    | 151.8 ± <b>53.49</b> (7-666)                                                                               | 0.0341  |
| Asp IgE (kUAD)     | 16.27±4.235 (0.35-62.00)                                                                                                         | 5.168±2.35 (0.35-25.7)                                                                                     | 0.0045  |
| Age (years)        | 29.21±2.490 (19-56)                                                                                                              | 36.63±3.304 (19-62)                                                                                        | 0.0637  |
| Gender             | <b>10 Males; 9 Females</b>                                                                                                       | <b>9 Males; 7 Females</b>                                                                                  | NS      |
| Genotype           | 8 homozygous ΔF508; 3 [-]/ΔF508; 2 ΔF508/2789+5G-A; 1 homozygous 711ΔT; 1ΔF508/621+1G-T; 2 ΔF508/R533X; 1 [-]/G542X; 1unreported | 6 homozygous ΔF508; 3 [-]/ΔF508; 1 ΔF508/R347H; 1 ΔF508/2789+5G-A; 1 G542X/[-]; 1 621+1GT/[-]; 2unreported | NS      |
| Steroid Use        | 4 of 19                                                                                                                          | 4 of 16                                                                                                    | NS      |
| Actigall Use       | 2 of 19                                                                                                                          | 3 of 16                                                                                                    | NS      |

|                           | ABPA Positive | ABPA Negative | P-Value |
|---------------------------|---------------|---------------|---------|
| Average Vitamin D (ng/mL) | 20.92±10.80   | 32.45±16.39   | 0.0042  |
| Average Vitamin A (μg/dL) | 53.17±16.23   | 49.97±17.74   | 0.1531  |
| Average Vitamin E (μg/mL) | 10.49±5.31    | 9.569±4.046   | 0.6151  |

Supplementary Figure 7

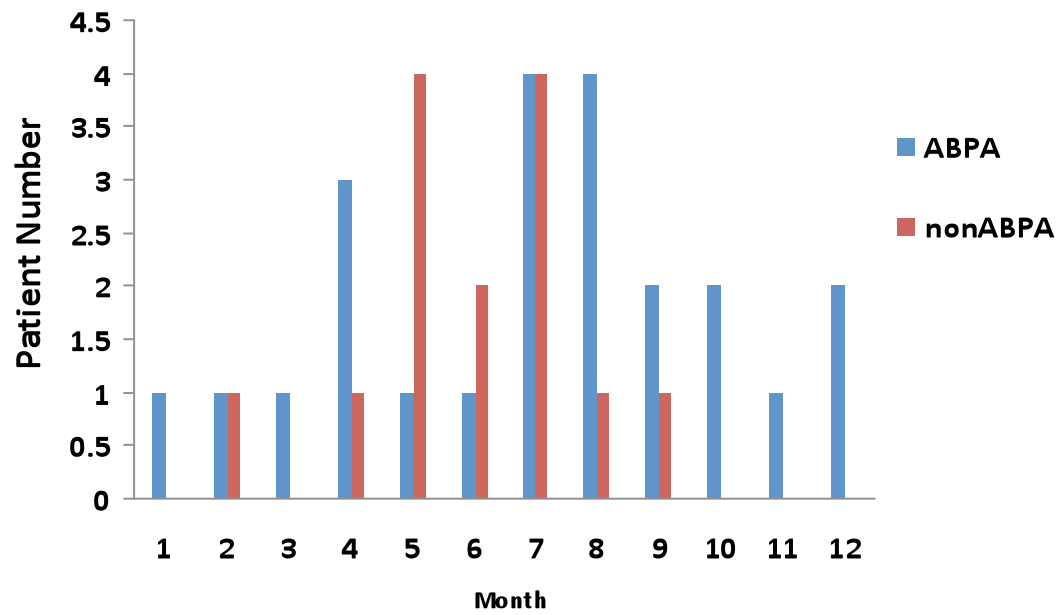

Enrollment histogram by month between the ABPA and non-ABPA cohort.
